# Supplementary material for: Steric hindrance effect on thermoresponsive behaviors of pyrrolidone-based polymers
Source: Royal Society of Chemistry journal article supplement (doi:10.1039/c2py20773g), 2012-11-20
Supplement: c2py20773g.pdf [file c2py20773g.pdf]

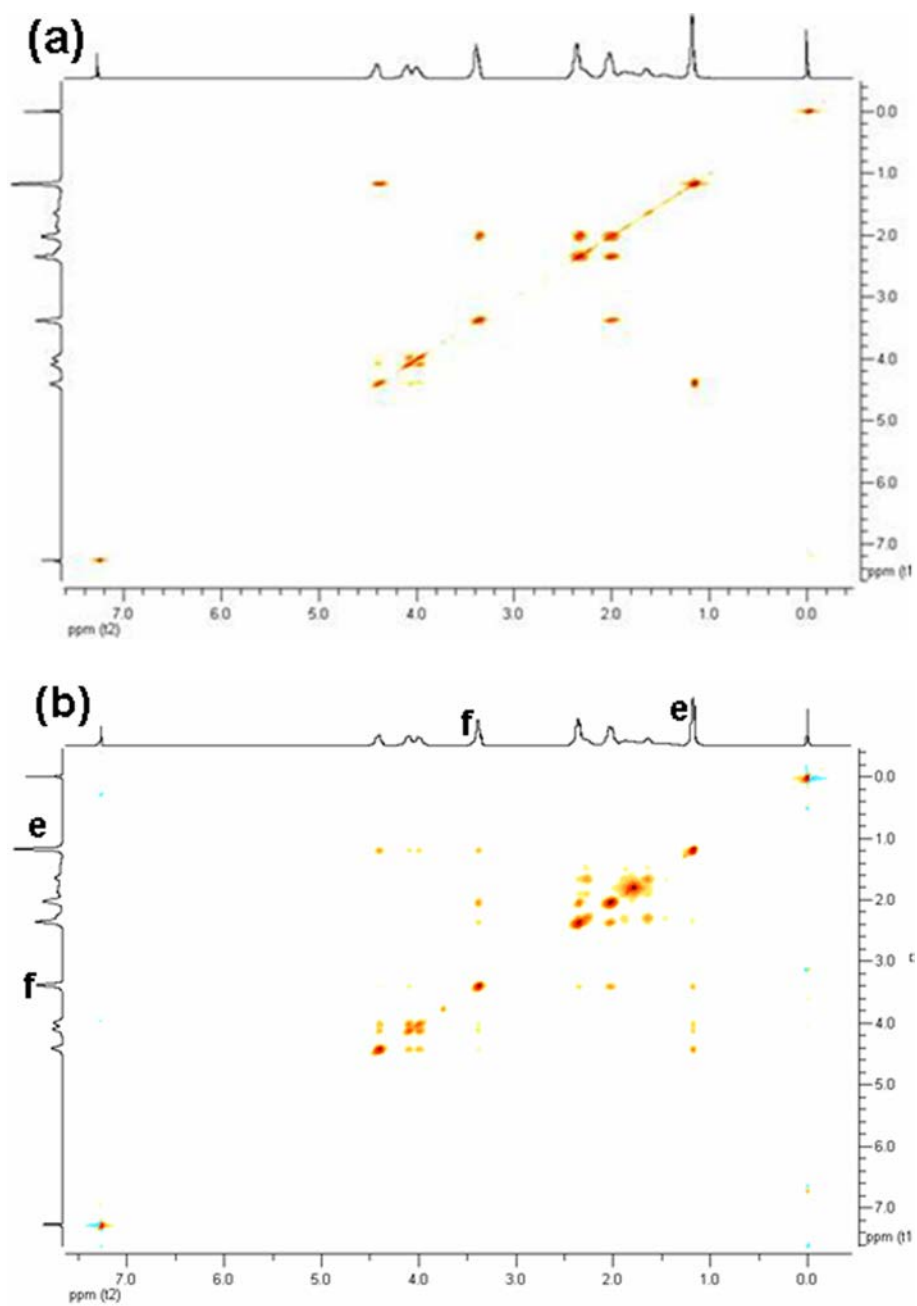

Figure S1. Two-dimensional homonuclear  $^1\text{H}$  COSY (a) and  $^1\text{H}$  NOESY (b) NMR spectra of PMEP in  $\text{CDCl}_3$ . One-dimensional  $^1\text{H}$  NMR spectra appear above and to the left to aid interpretation.

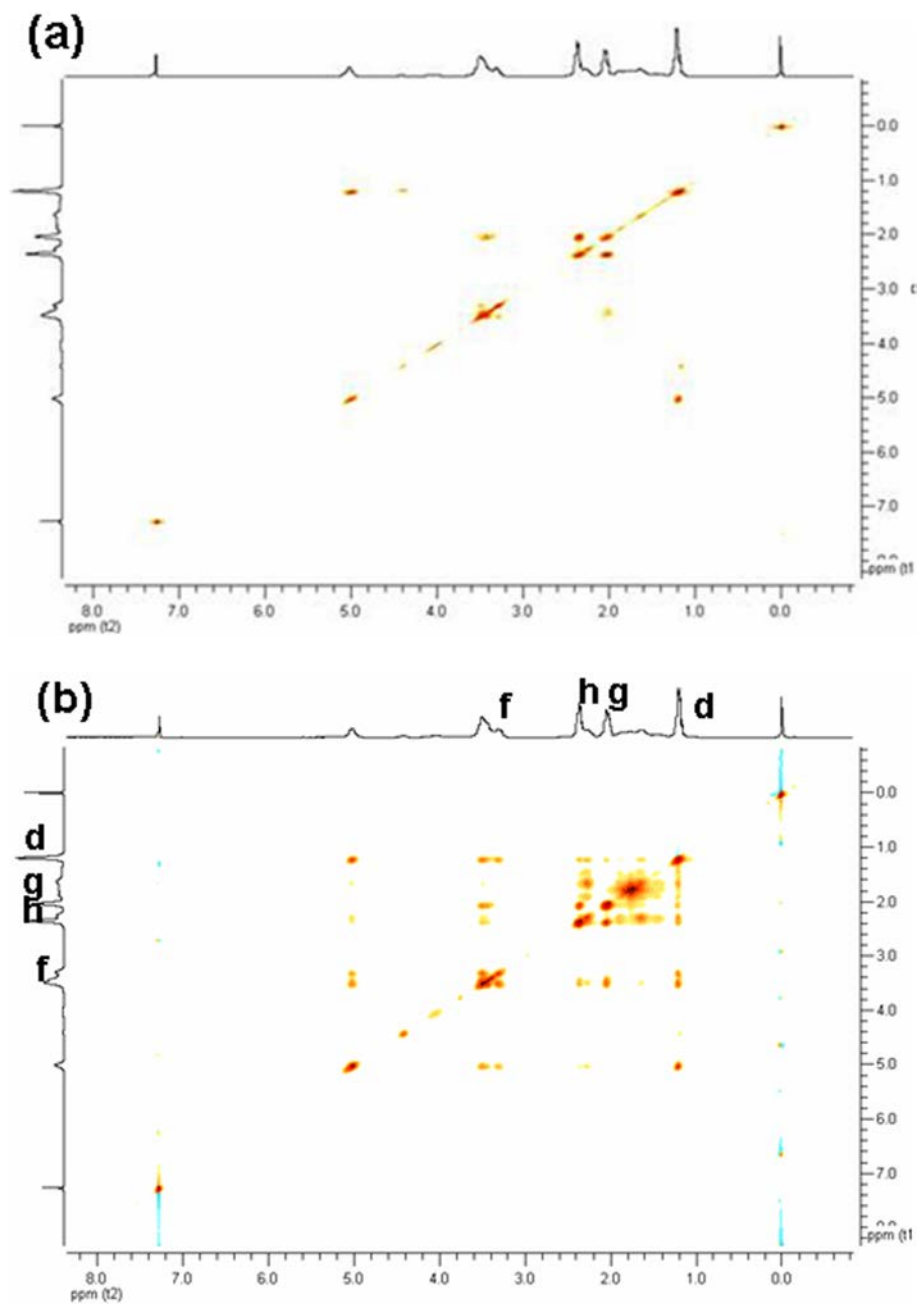

Figure S2. Two-dimensional homonuclear  $^1\text{H}$  COSY (a) and  $^1\text{H}$  NOESY (b) NMR spectra of PAPP in  $\text{CDCl}_3$ . One-dimensional  $^1\text{H}$  NMR spectra appear above and to the left to aid interpretation.
